# Supplementary material for: Epidemiological change of influenza virus in hospitalized children with acute respiratory tract infection during 2014−2022 in Hubei Province, China
Source: Springer Nature journal article supplement (doi:10.1186/s12985-023-02092-1), 2023-06-13

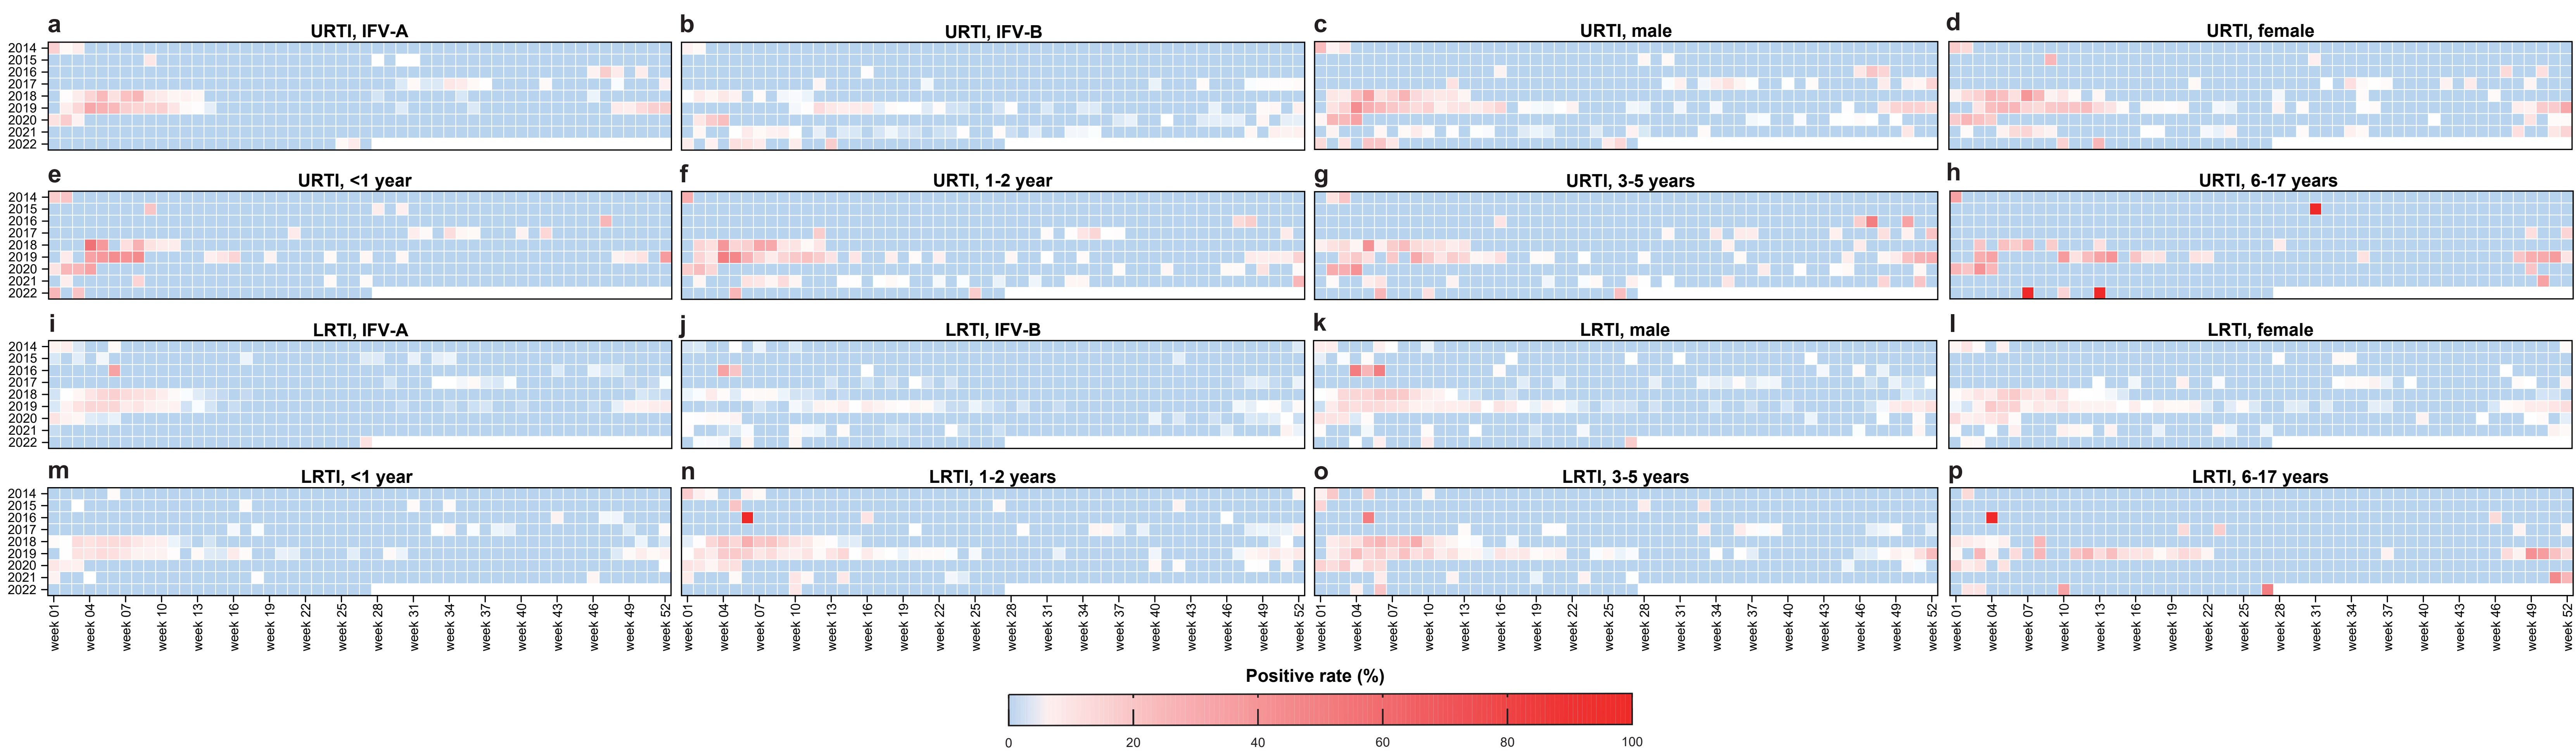

Supplement: MOESM2 [file 25481846]
